# Supplementary material
Source: publisher site journal article supplement (https://www.degruyterbrill.com/publication/isbn/9783486718102/downloadAsset/9783486718102_Buchinformation.pdf)
Supplement: Supplementary file 1 [file 9783486718102_Buchinformation.pdf]

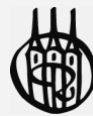

# Im „Deutschen Herbst“ 1977

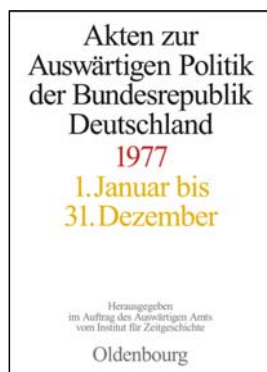

## Akten zur Auswärtigen Politik der Bundesrepublik Deutschland 1977

Herausgegeben im Auftrag des Auswärtigen Amts  
vom Institut für Zeitgeschichte  
Haupterausgeber Horst Möller  
Mitherausgeber Klaus Hildebrand und Gregor Schöllgen  
Wissenschaftliche Leiterin: Ilse Dorothee Pautsch  
Bearbeitet von Amit Das Gupta, Tim Geiger, Matthias Peter,  
Fabian Hilfrich, Mechthild Lindemann

2008 | LXXXV, 1968 S. | Leinen  
in 2 Teilbänden | € 138,00  
ISBN 978-3-486-58338-0

1977, im „Deutschen Herbst“, wurde der RAF-Terrorismus auch außenpolitisch zur zentralen Herausforderung der Bundesrepublik: Die Entführung des Arbeitgeberpräsidenten Schleyer und der Lufthansa-Maschine „Landshut“ nach Mogadischu erforderten ein umfassendes, hier erstmals aus amtlichen Quellen dokumentiertes Krisenmanagement. Die Übernahme eines nichtständigen Sitzes im UNO-Sicherheitsrat brachte Bonn neue Aufgaben auf globaler Ebene, insbesondere bei den Konflikten im südlichen Afrika. Im transatlantischen Verhältnis führten die Kontroverse um die Neutronenbombe, das Nuklearabkommen mit Brasilien sowie die Behandlung von Menschenrechtsfragen zu Irritationen gegenüber der neuen Carter-Administration. Auf den MBFR-Verhandlungen in Wien und der KSZE-Folgekonferenz in Belgrad wurden Wege aus der drohenden Stagnation im Ost-West-Verhältnis gesucht.

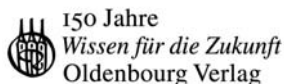

[oldenbourg.de](http://oldenbourg.de)

Rezensionsexemplare auf Anforderung:

**Pressereferat Geisteswissenschaften – Ulrike Staudinger**

Oldenbourg Wissenschaftsverlag | Rosenheimer Str. 145 | 81671 München

Tel.: +49 89 45051-211 | Fax: +49 89 45051-204 | [ulrike.staudinger@oldenbourg.de](mailto:ulrike.staudinger@oldenbourg.de)

Alle Veröffentlichungen des Oldenbourg Verlags sind über den Buchhandel zu beziehen.

Oldenbourg
